# Supplementary material
Source: PubMed Central journal article supplement (PMC6118127)

Supplementary Figure 1

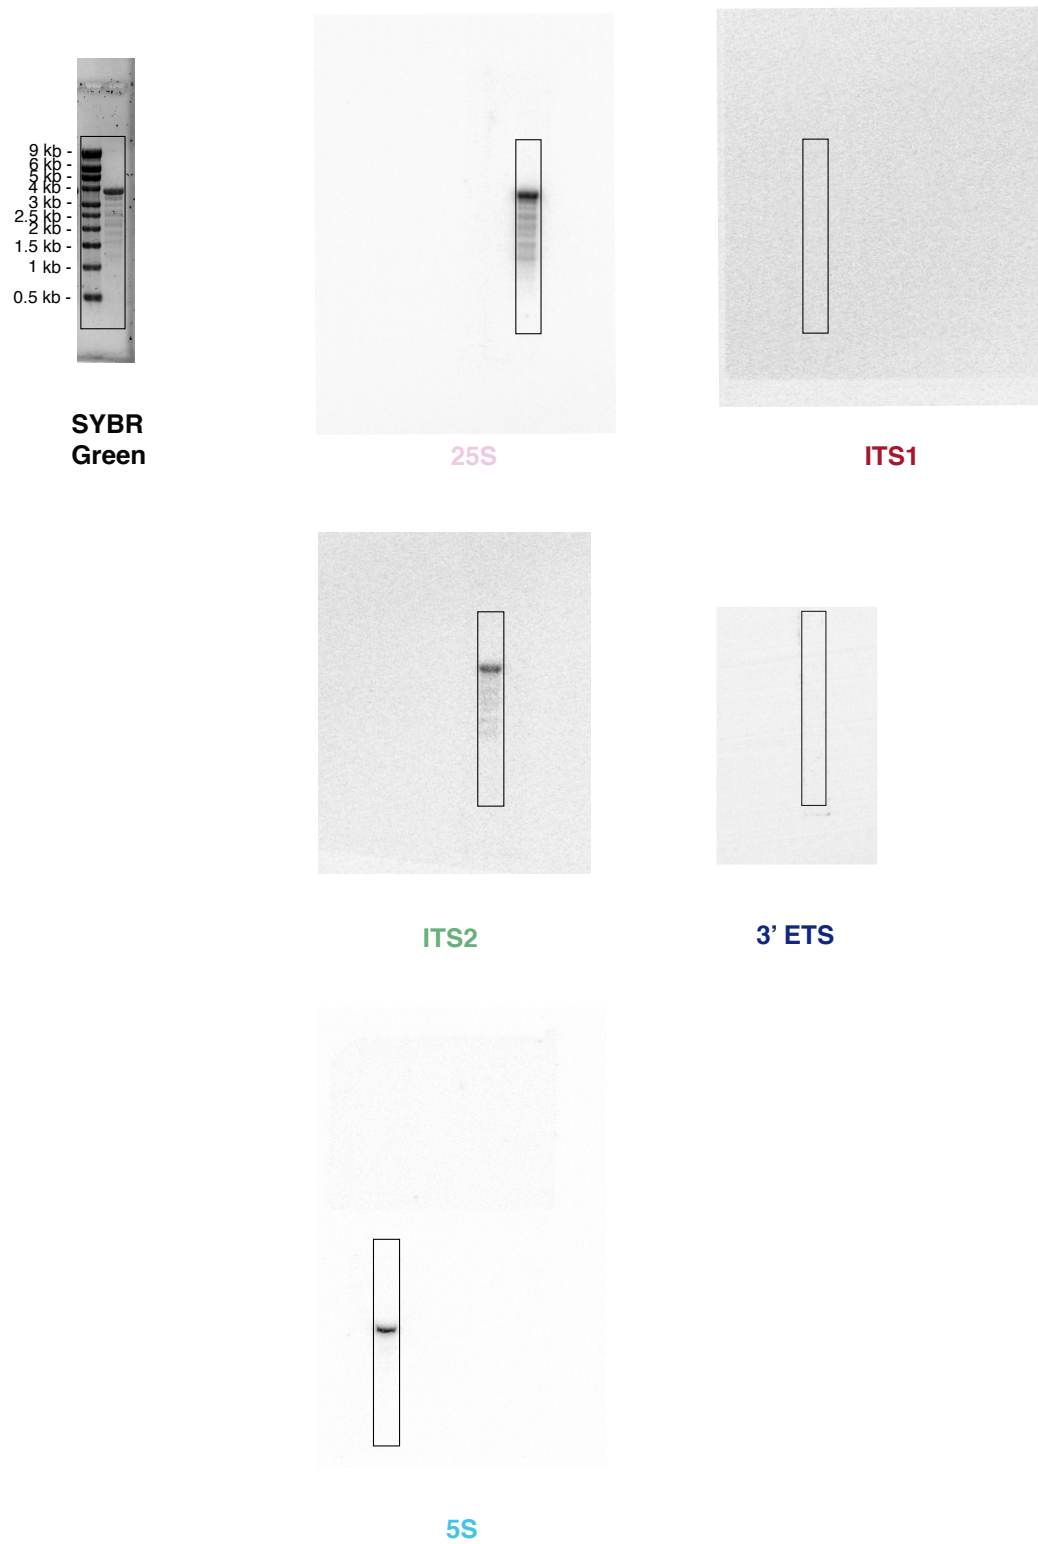

Supplement: NIHMS978047-supplement-Supplementary_Figure1.pdf [file NIHMS978047-supplement-Supplementary_Figure1.pdf]
